# Supplementary material for: Waardenburg Syndrome: The Contribution of Next-Generation Sequencing to the Identification of Novel Causative Variants
Source: MDPI journal article supplement (doi:10.3390/audiolres14010002), 2023-12-21
Supplement: s1 [file s1]

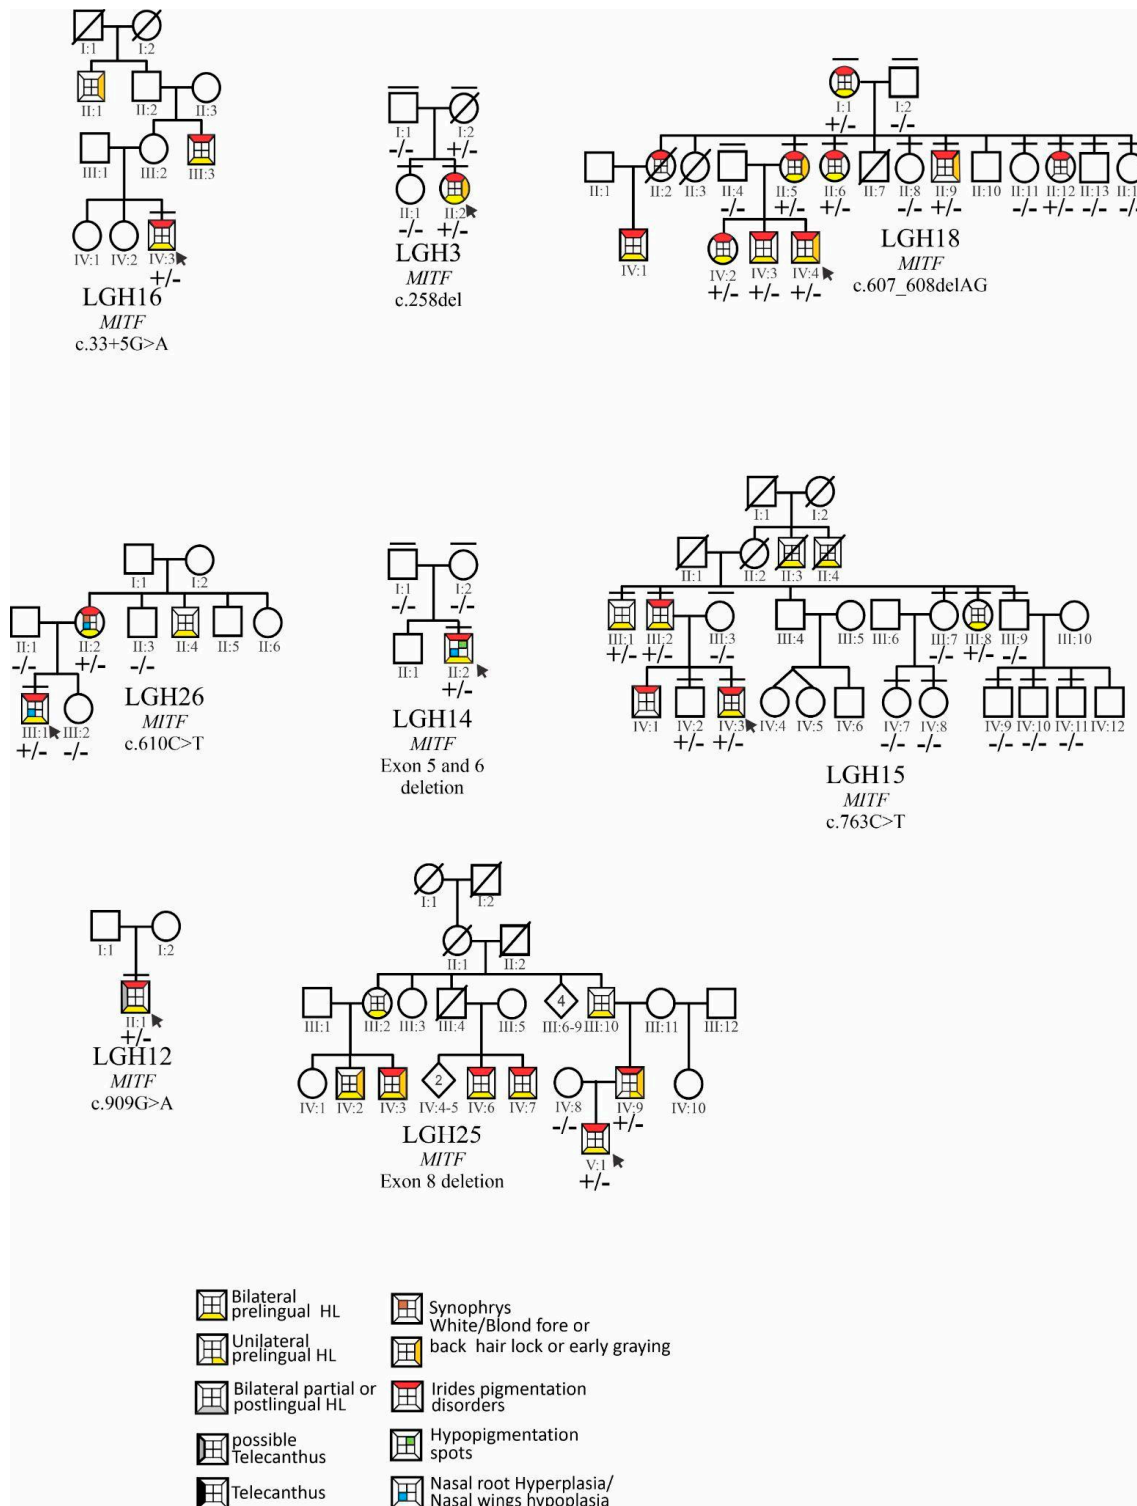

Figure S1: Pedigrees of the cases with the clinical characterization and the segregation of the variants

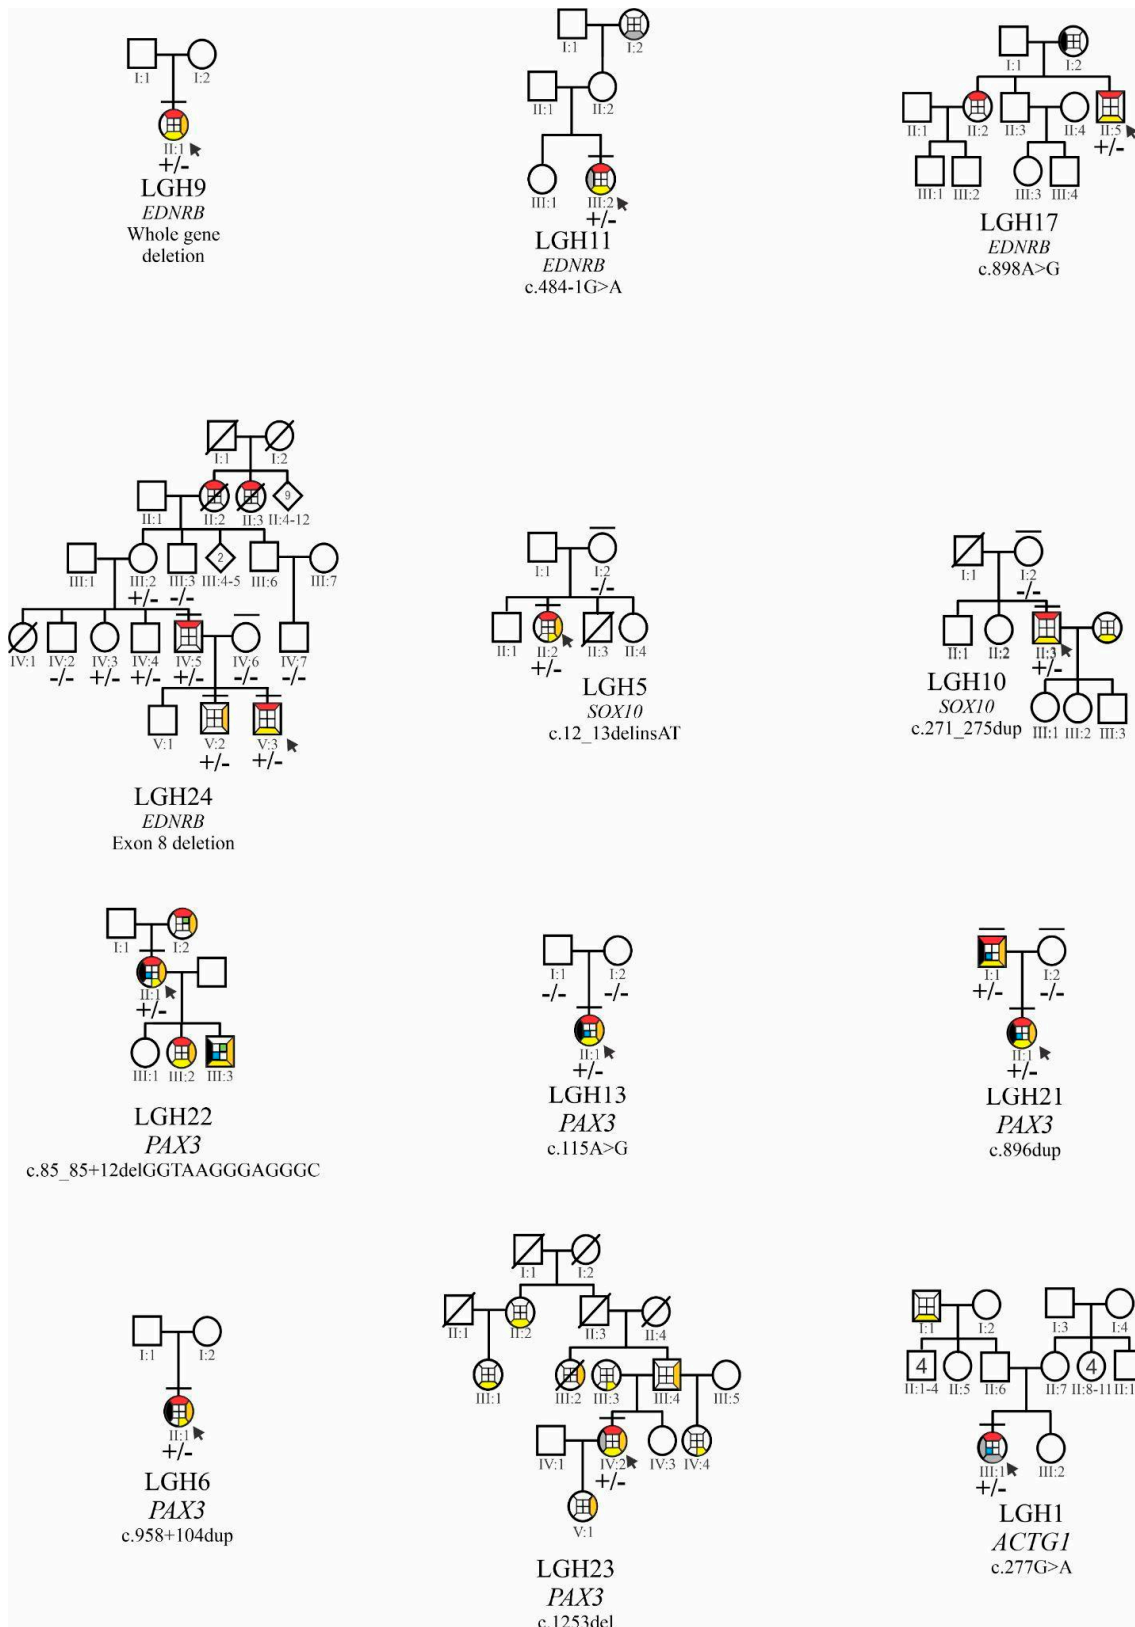

Continuation of Figure S1

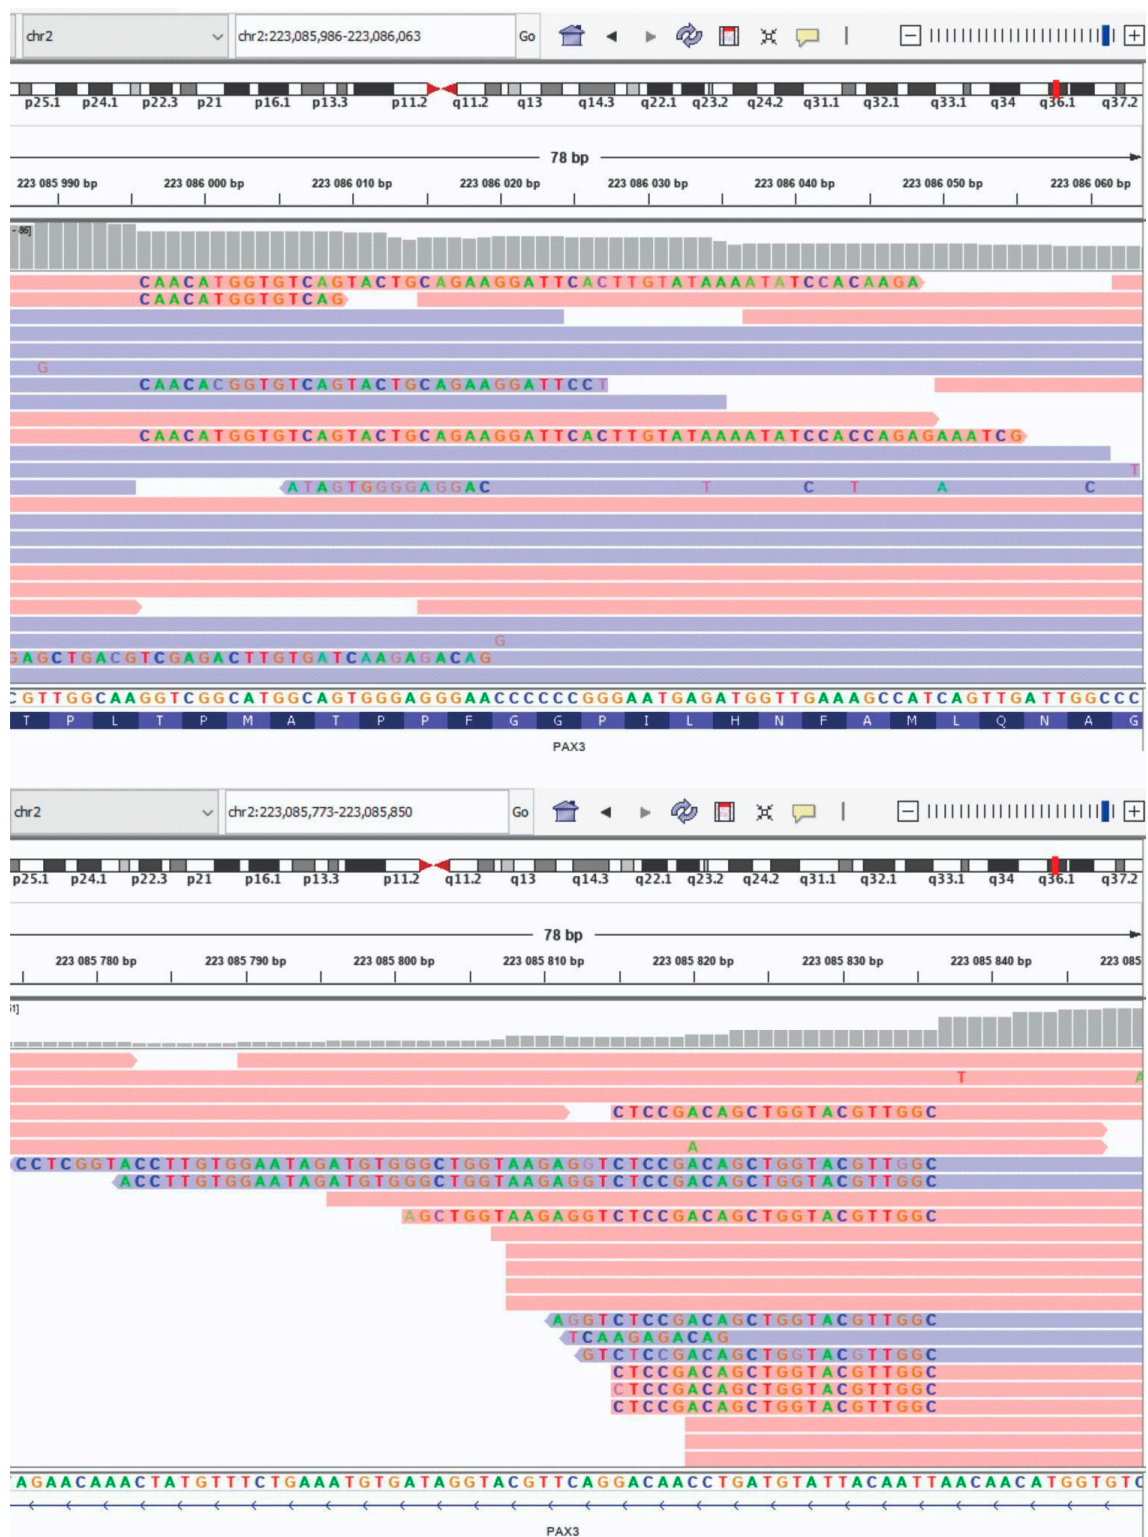

Figure S2: Visualization in IGV of the misaligned soft-clipped reads of proband LGH6.
